# Supplementary material
Source: PubMed Central journal article supplement (PMC3075134)

### Model

### EMG to force transfer function

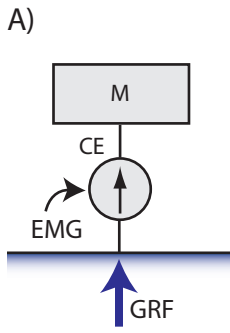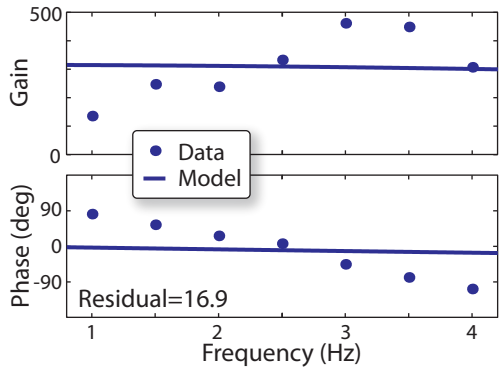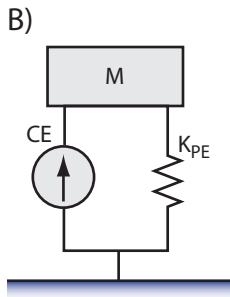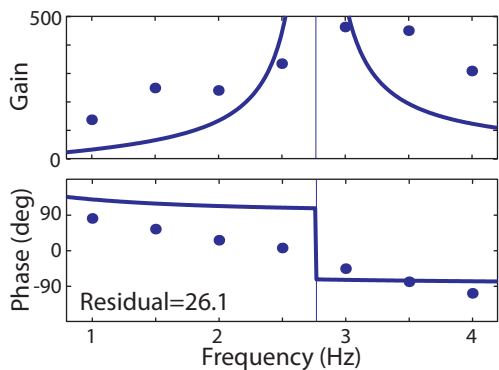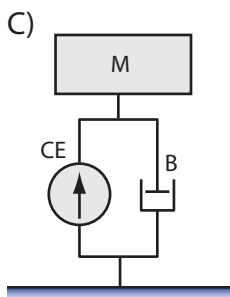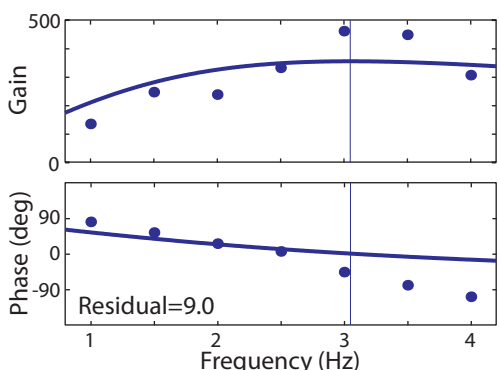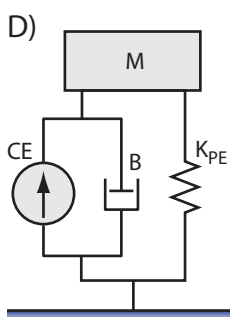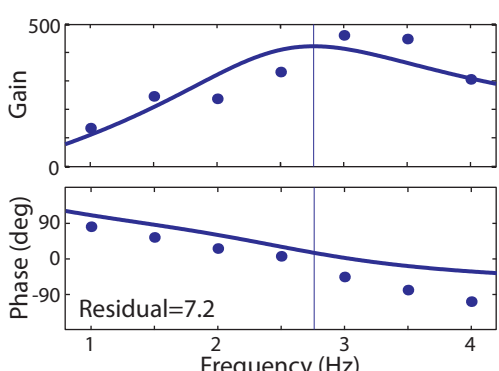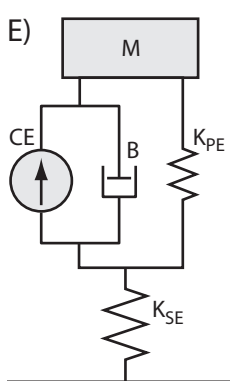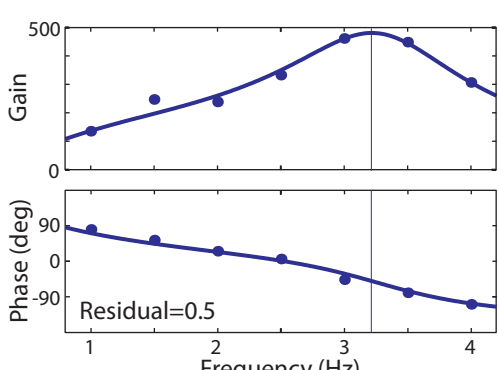

Supplement: supp_japplphysiol.00505.2010_figS1.pdf [file supp_japplphysiol.00505.2010_figS1.pdf]

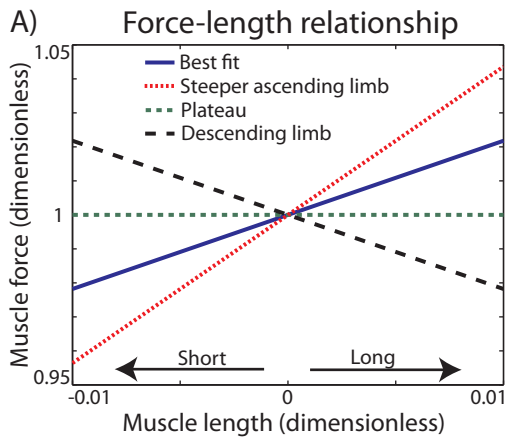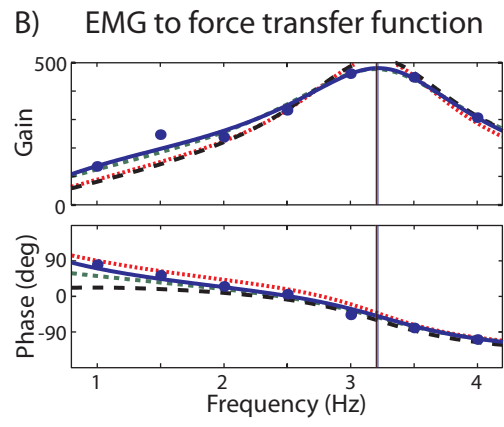

Supplement: supp_japplphysiol.00505.2010_figS2.pdf [file supp_japplphysiol.00505.2010_figS2.pdf]

A) Force-velocity relationship

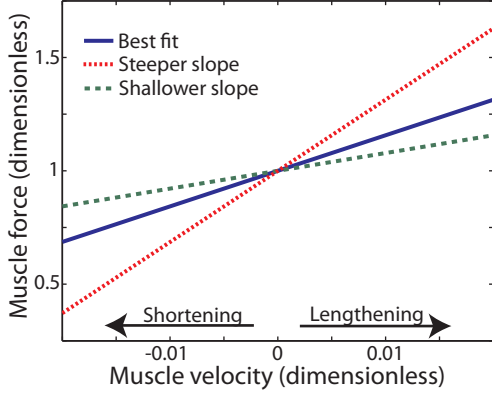

B) EMG to force transfer function

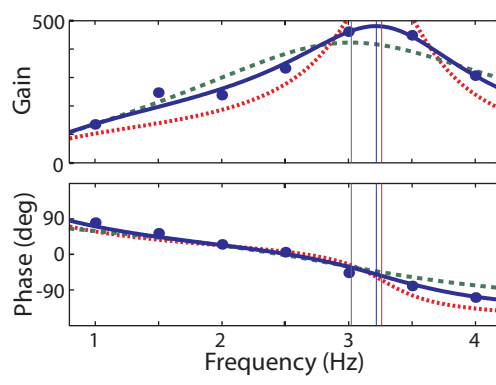

Supplement: supp_japplphysiol.00505.2010_figS3.pdf [file supp_japplphysiol.00505.2010_figS3.pdf]
